# Supplementary material for: Space-filling open microfluidic channels designed to collect water droplets
Source: Royal Society of Chemistry journal article supplement (doi:10.1039/c8ra02655f), 2018-01-01
Supplement: c8ra02655f1.pdf [file c8ra02655f1.pdf]

## Supporting Information for

# Space-filling open microfluidic channels designed to collect water droplets

Hiroyuki Kai\*, Ryoma Toyosato, and Matsuhiko Nishizawa\*

Department of Finemechanics, Graduate School of Engineering, Tohoku University, 6-6-01 Aramaki, Aoba-ku, Sendai 980-8579, Japan

E-mail: kai@biomems.mech.tohoku.ac.jp, nishizawa@biomems.mech.tohoku.ac.jp

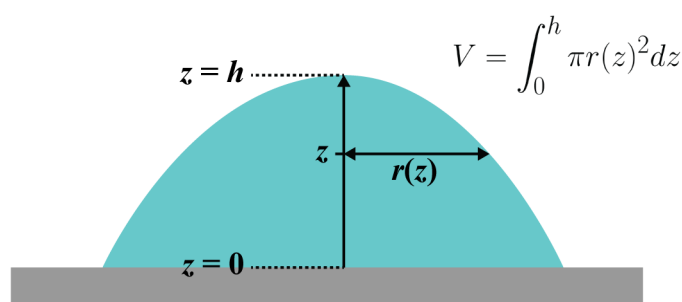

**Fig. S1** Approximation of a droplet as a solid of revolution to calculate droplet volume.

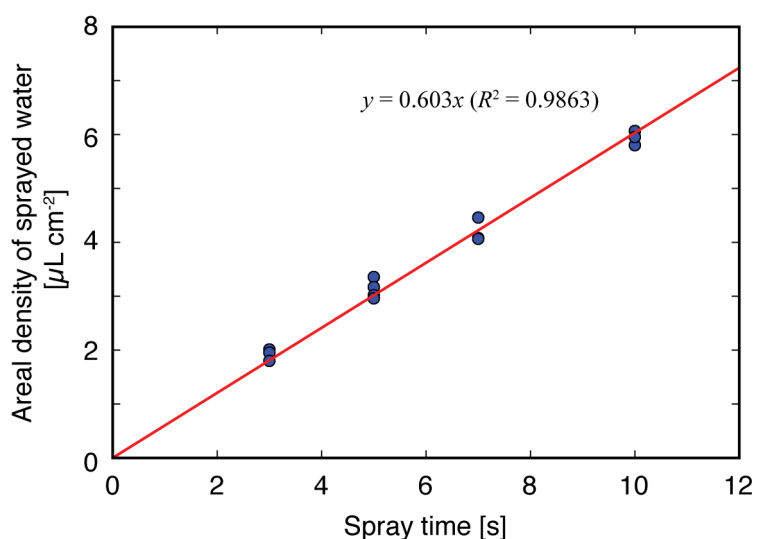

**Fig. S2** Measurement of the spraying rate of water droplets.

**a**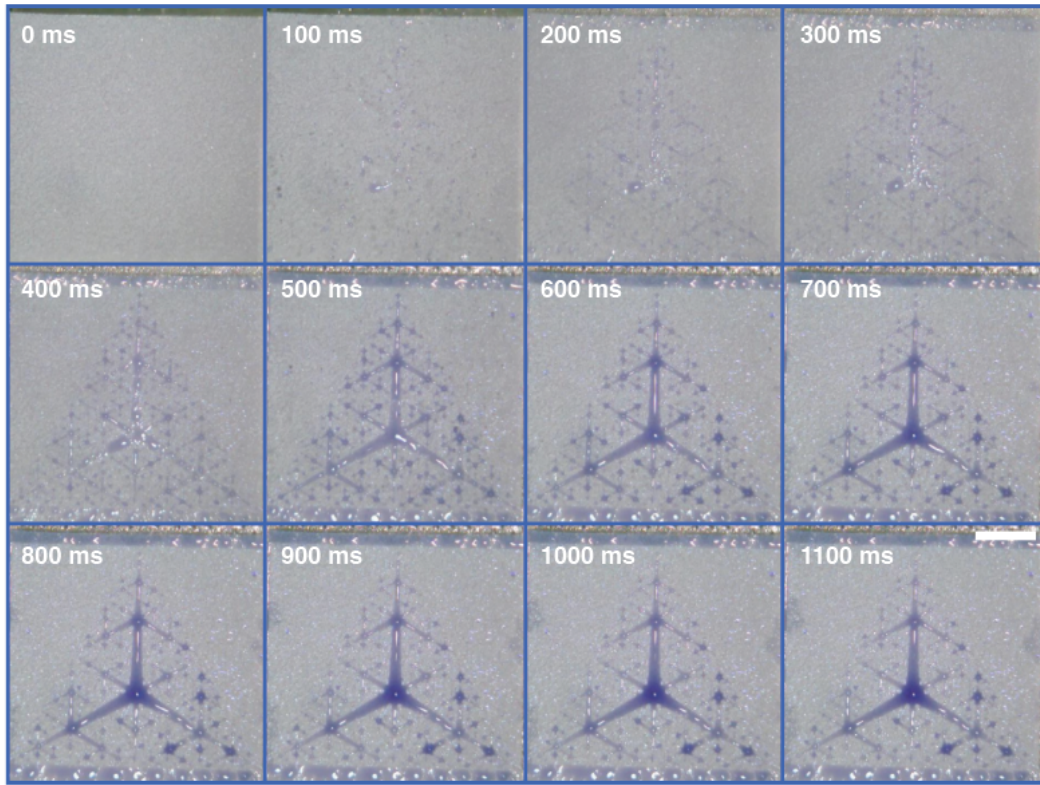**b**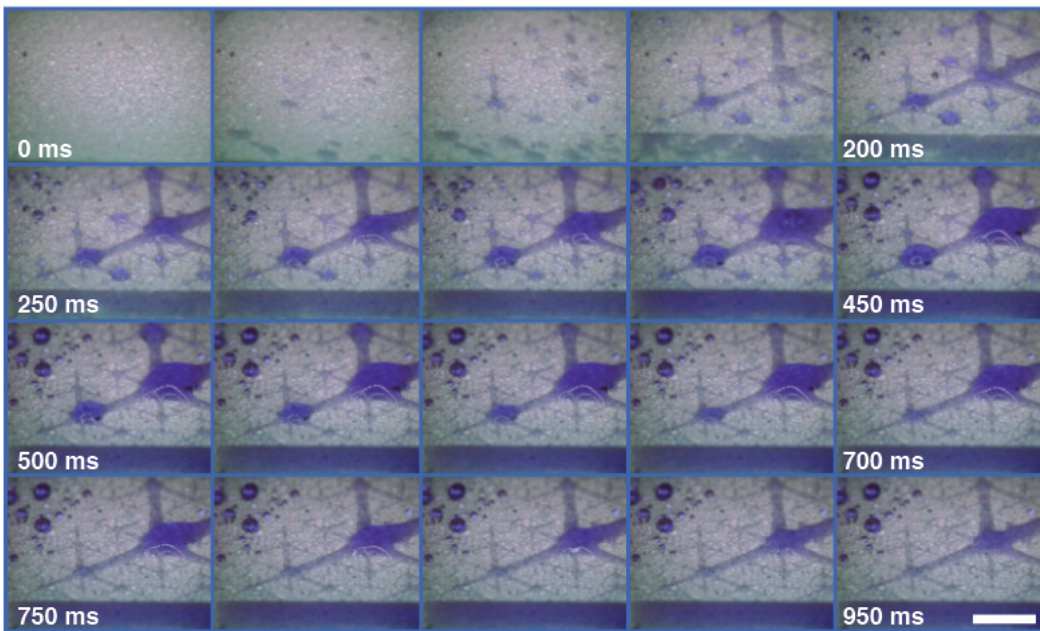

**Fig. S3** Snapshots from high-speed microscopy of the process of droplet transport by the pattern with  $G = 6$  and  $\alpha = 5$ . (a) The view of the entire film with water droplets sprayed until 0.7 s (Supplementary Movie 1). (b) The magnified perspective view of the film with water droplets sprayed until 0.6 s (Supplementary Movie 2). Scale bars are 5 mm (a) and 2 mm (b).

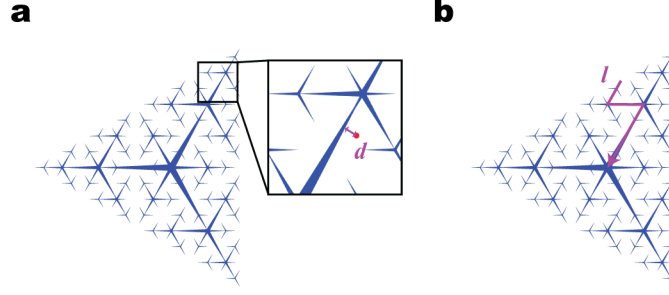

**Fig. S4** Schematics illustrating the definitions of geometrical metrics. (a) Distance between a point and the closest superhydrophilic channel ( $d_{x,y}$ ) and (b) path length ( $l_{x,y}$ ).

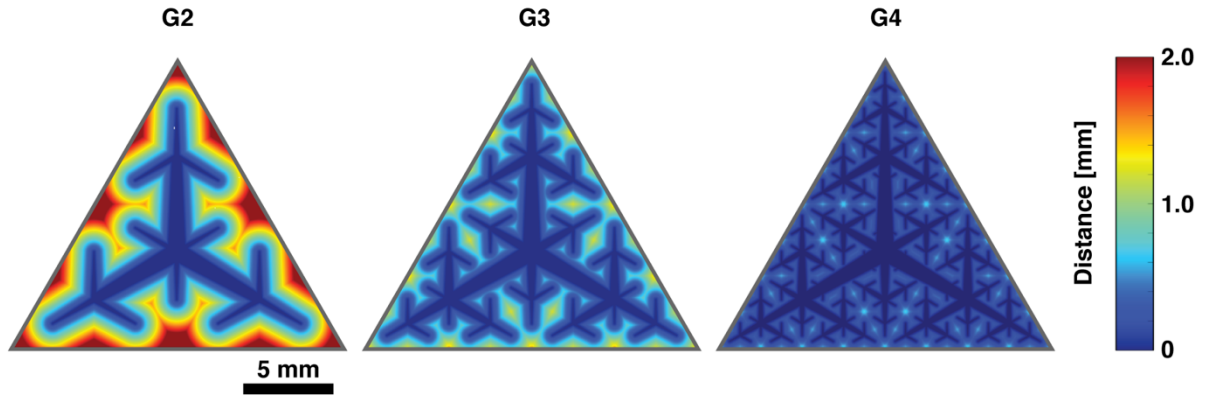

**Fig. S5** A map of the distance to hydrophilic paths ( $d_{x,y}$ ) for patterns with various  $G$  and  $\alpha = 5^\circ$ .

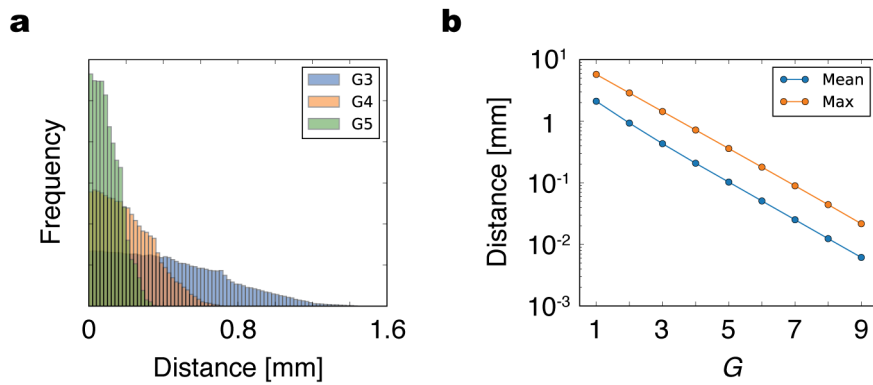

**Fig. S6** Effects of  $G$  and  $\alpha$  on the surface filling with superhydrophilic channels. The distance between a point  $(x, y)$  on the surface and the closest hydrophilic channel is defined as  $d_{x,y}$ . (a) Histogram of  $d_{x,y}$  and (b) maximum and mean of  $d_{x,y}$ .

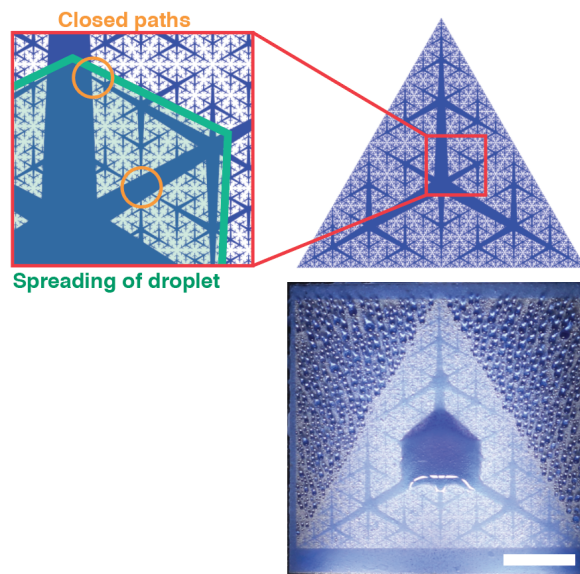

**Fig. S7** (a) The pattern of  $G = 8$  and  $\alpha = 5$  that shows a closed superhydrophilic paths. (b) Spreading of water around the center at the pattern of  $G = 8$  and  $\alpha = 5$ , sprayed with water for 15 s. Scale bar is 5 mm.

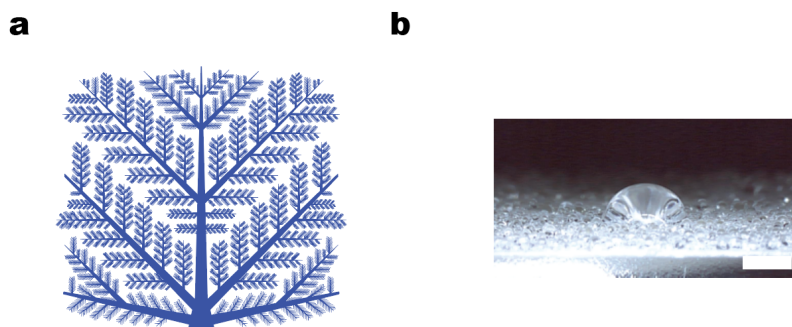

**Fig. S8** (a) Replication of the non-fractal hierarchical pattern by Wang et al.<sup>6</sup> (b) The side view of the droplet collected by the pattern (a large water drop at the center) sprayed with colorless water droplet for 10 s. Scale bar is 1 mm.

| Literature   | Collection rate<br>[ $\mu\text{L cm}^{-2} \text{ min}^{-1}$ ] | Water supply rate<br>[ $\mu\text{L cm}^{-2} \text{ min}^{-1}$ ] | Collection efficiency | Method for water supply                             | Note                                                                                 |
|--------------|---------------------------------------------------------------|-----------------------------------------------------------------|-----------------------|-----------------------------------------------------|--------------------------------------------------------------------------------------|
| Ref. 1       | 13                                                            | 253                                                             | 5%                    | A fog flow from a nebulizer                         | Efficiency calculated by the assumption the mist contained saturated water at 25 °C. |
| Ref. 2       | 0.07                                                          | (No water flow)                                                 | N/A                   | Air of 12 °C with a water vapor pressure of 2800 Pa | No water flow was applied and the direct comparison is difficult.                    |
| Ref. 5       | 2.7                                                           | (No water flow)                                                 | N/A                   | Air of 35 °C, 80% relative humidity                 | The sample surface temperature was $18.2 \pm 0.5$ °C.                                |
| Ref. 7       | 46.3                                                          | Unknown                                                         | N/A                   | A fog flow with 75 $\text{cm s}^{-2}$ velocity      |                                                                                      |
| Ref. 8       | 50                                                            | 4500                                                            | 1%                    | A fog flow from a nebulizer                         |                                                                                      |
| Ref. 8       | 8                                                             | 32                                                              | 25%                   | Water droplets from a spray nozzle                  | Measured in the present work                                                         |
| Present work | 27                                                            | 36                                                              | 74%                   | Water droplets from a spray nozzle                  |                                                                                      |

**Table S1** Comparison of water collection efficiencies between the present work and the previous reports.

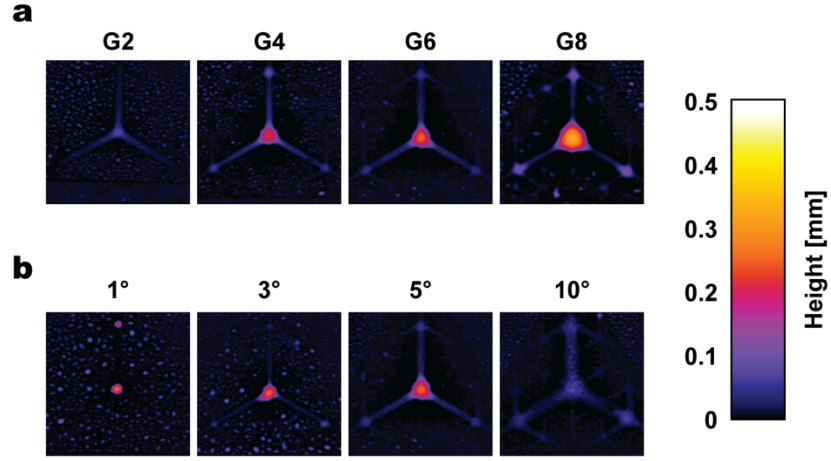

**Fig. S9** Surface morphologies of liquid after spraying droplets on patterns with various  $G$  (a) and  $\alpha$  (b) measured by a laser scanner.

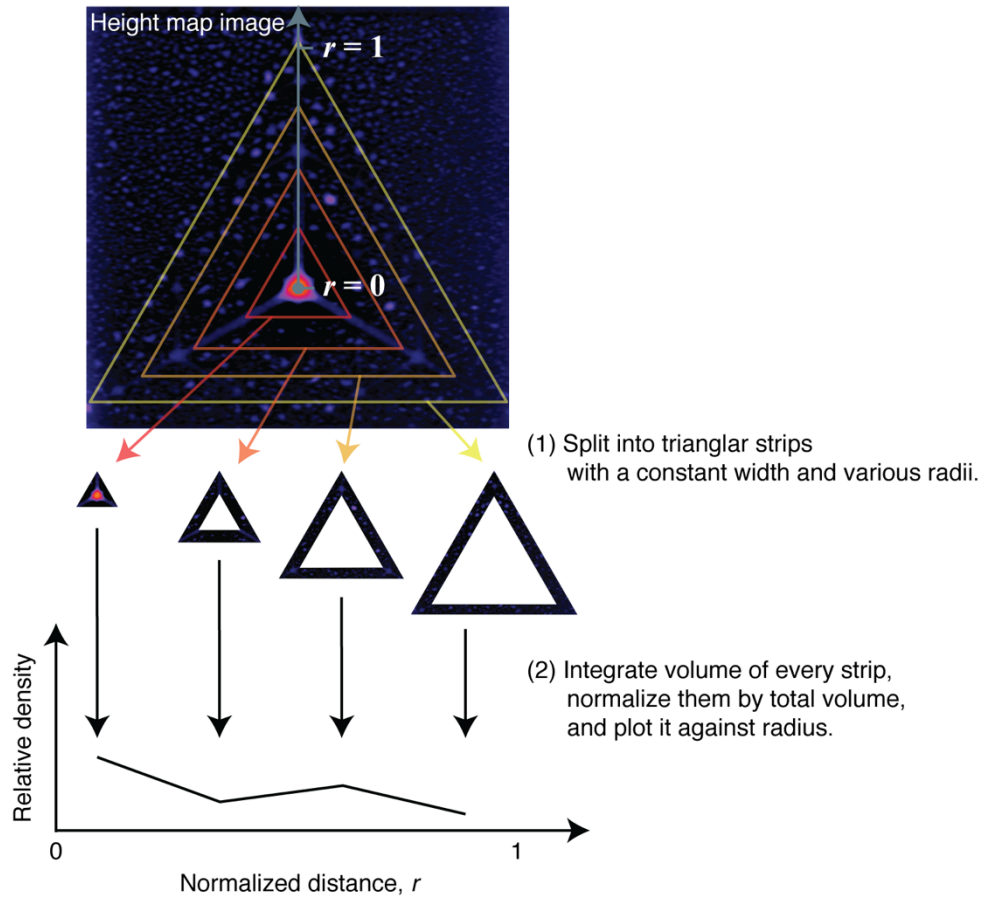

**Fig. S10** Schematics illustrating the definition of a radial density profile.
